# Supplementary material for: Structure, sensing and photocatalytic properties of two multifunctional 3D luminescent coordination polymers based on an N-heterocyclic carboxylic acid
Source: Royal Society of Chemistry journal article supplement (doi:10.1039/c8nj01359d), 2018-01-01
Supplement: c8nj01359d1.pdf [file c8nj01359d1.pdf]

## Structure, Sensing and Photocatalytic Properties of two Multifunctional 3D Luminescent Coordination Polymer Based on N-heterocyclic carboxylic acid

Ziao Zong<sup>a</sup>, Caifeng Bi<sup>a</sup>, Zheng Zhu<sup>a</sup>, Chuanbin Fan<sup>a</sup>, Xiangmin Meng<sup>b</sup>, Xia Zhang<sup>\*a</sup>,  
Yuhua Fan<sup>\*a</sup>

- a. Key Laboratory of Marine Chemistry Theory and Technology, Ministry of Education, College of Chemistry and Chemical Engineering, Ocean University of China, Qingdao, Shandong 266100, P.R. China.
- b. College of Marine Science and Biological Engineering, Qingdao University Science and Technology, Qingdao, Shandong 266042, P.R. China

**Table. S1** Selected Bond lengths [Å] and angles [°] for complexes **1** and **2**

| Complex 1 |            | Complex 2 |            |
|-----------|------------|-----------|------------|
| Zn1-O1    | 1.942(2)   | Zn1-O1    | 1.969(6)   |
| Zn1-O4    | 1.951(2)   | Zn1-O4    | 1.972(7)   |
| Zn1-N5    | 2.004(3)   | Zn1-N7    | 2.034(4)   |
| Zn1-N7    | 2.018(3)   | Zn1-N4    | 2.005(4)   |
| O1-Zn1-O4 | 100.58(11) | N7-Zn1-O1 | 96.6(2)    |
| O1-Zn1-N5 | 116.30(11) | N7-Zn1-O4 | 97.8(2)    |
| O1-Zn1-N7 | 105.84(12) | N7-Zn1-N4 | 104.39(18) |
| N5-Zn1-O4 | 112.17(12) | O4-Zn1-O1 | 114.6(3)   |
| N7-Zn1-O4 | 111.33(11) | O4-Zn1-N4 | 124.0(3)   |

Symmetry codes for **1**: (i)  $x-1/2, -y+2, z+1/2$ ; (ii)  $x-1, y, z$ ; (iii)  $x+1/2, -y+2, z-1/2$ ; (iv)  $x+1, y, z$ .

Symmetry codes for **2**: (i)  $x, -y+2, z-1/2$ ; (ii)  $x+1/2, y-1/2, z$ ; (iii)  $x, -y+2, z+1/2$ ; (iv)  $x-1/2, y+1/2, z$ .

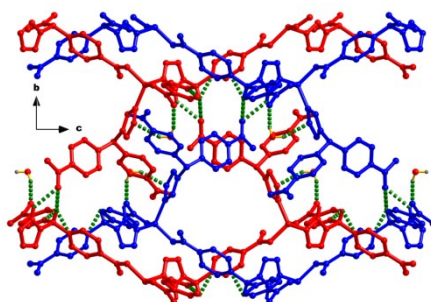

**Fig. S1** The 2D  $\rightarrow$ 3D supramolecular network through O-H...O and C-H...O bonds.

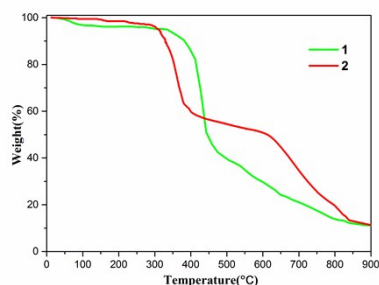

**Fig.S2** TG curve of complexes **1** and **2**.

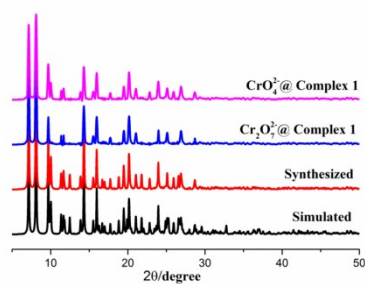

**Fig. S3** Powder XRD pattern of complex 1

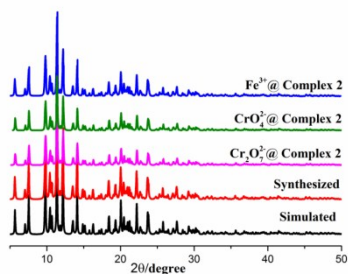

**Fig. S4** Powder XRD pattern of complex 2

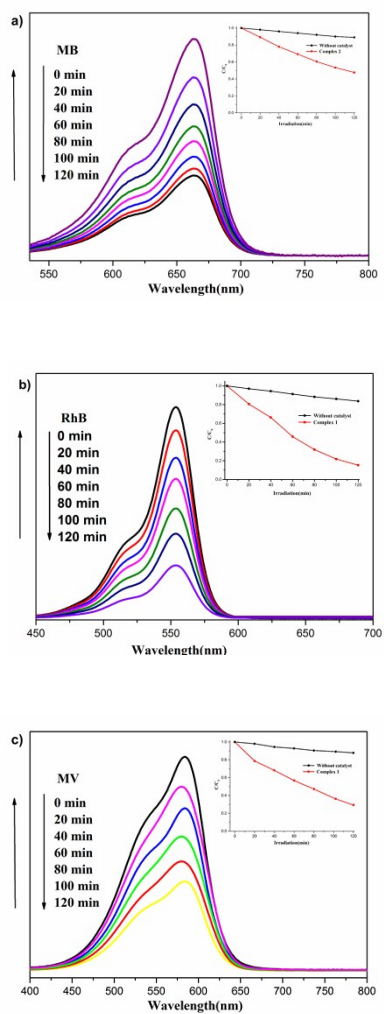

**Fig. S5** (a) Absorption spectra of the MB solution in the presence of complex 2. (b) Absorption

spectra of the RhB solution in the presence of complex **1**. (c) Absorption spectra of the MV solution in the presence of complex **1**.

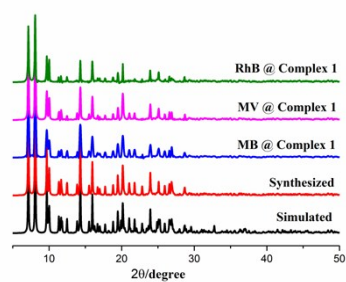

**Fig. S6** PXRD patterns of complex **1** before and after photocatalysis process.

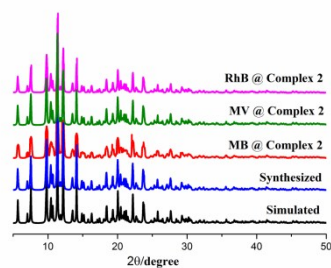

**Fig. S7** PXRD patterns of complex **2** before and after photocatalysis process.
